# Supplementary material
Source: Springer Nature journal article supplement (https://www.springermedizin.de/resource/supplementary/12890_2013_603_MOESM1_ESM.pdf/9505426)
Supplement: MOESM1 [file 9505426]

282 individual Tests

273

258

220 subjects completed the study

Technical problems,  
insufficient cooperation,  
incomplete data  
(9)

Lost during follow-up (3),  
malignoma (11) and lung  
transplantation (1)

Inaccurate MRT estimation (38)  
- 22 without VO<sub>2</sub> plateau  
- 16 with marked VO<sub>2</sub> variability
